# Supplementary material
Source: PubMed Central journal article supplement (PMC10895928)
Supplement: NIHMS1944276-supplement-4.pdf [file NIHMS1944276-supplement-4.pdf]

**A**

Compartmental changes in regions contained within differential CTCF hybrid loops

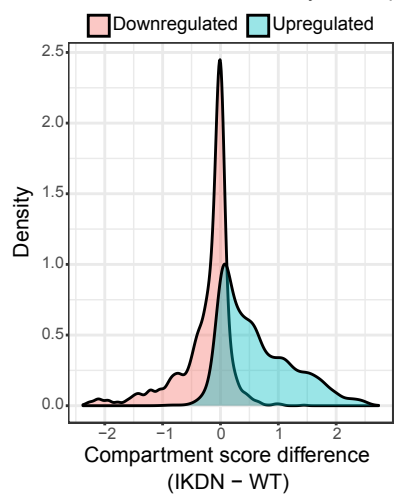**B**

Compartmental changes in regions contained within differential H3K27ac loops

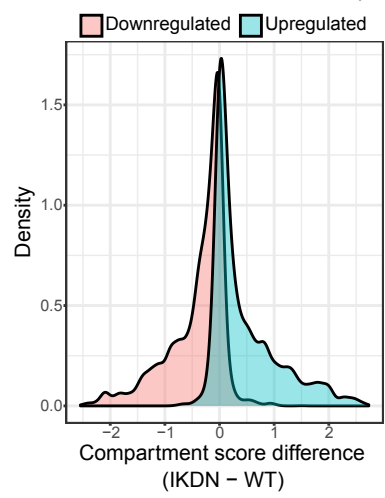**C**

Size distribution of differential H3K27ac loops

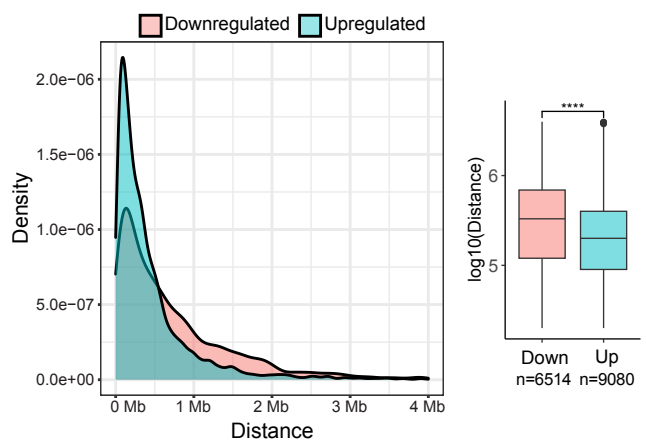**D**

WT preB

IKDN preB

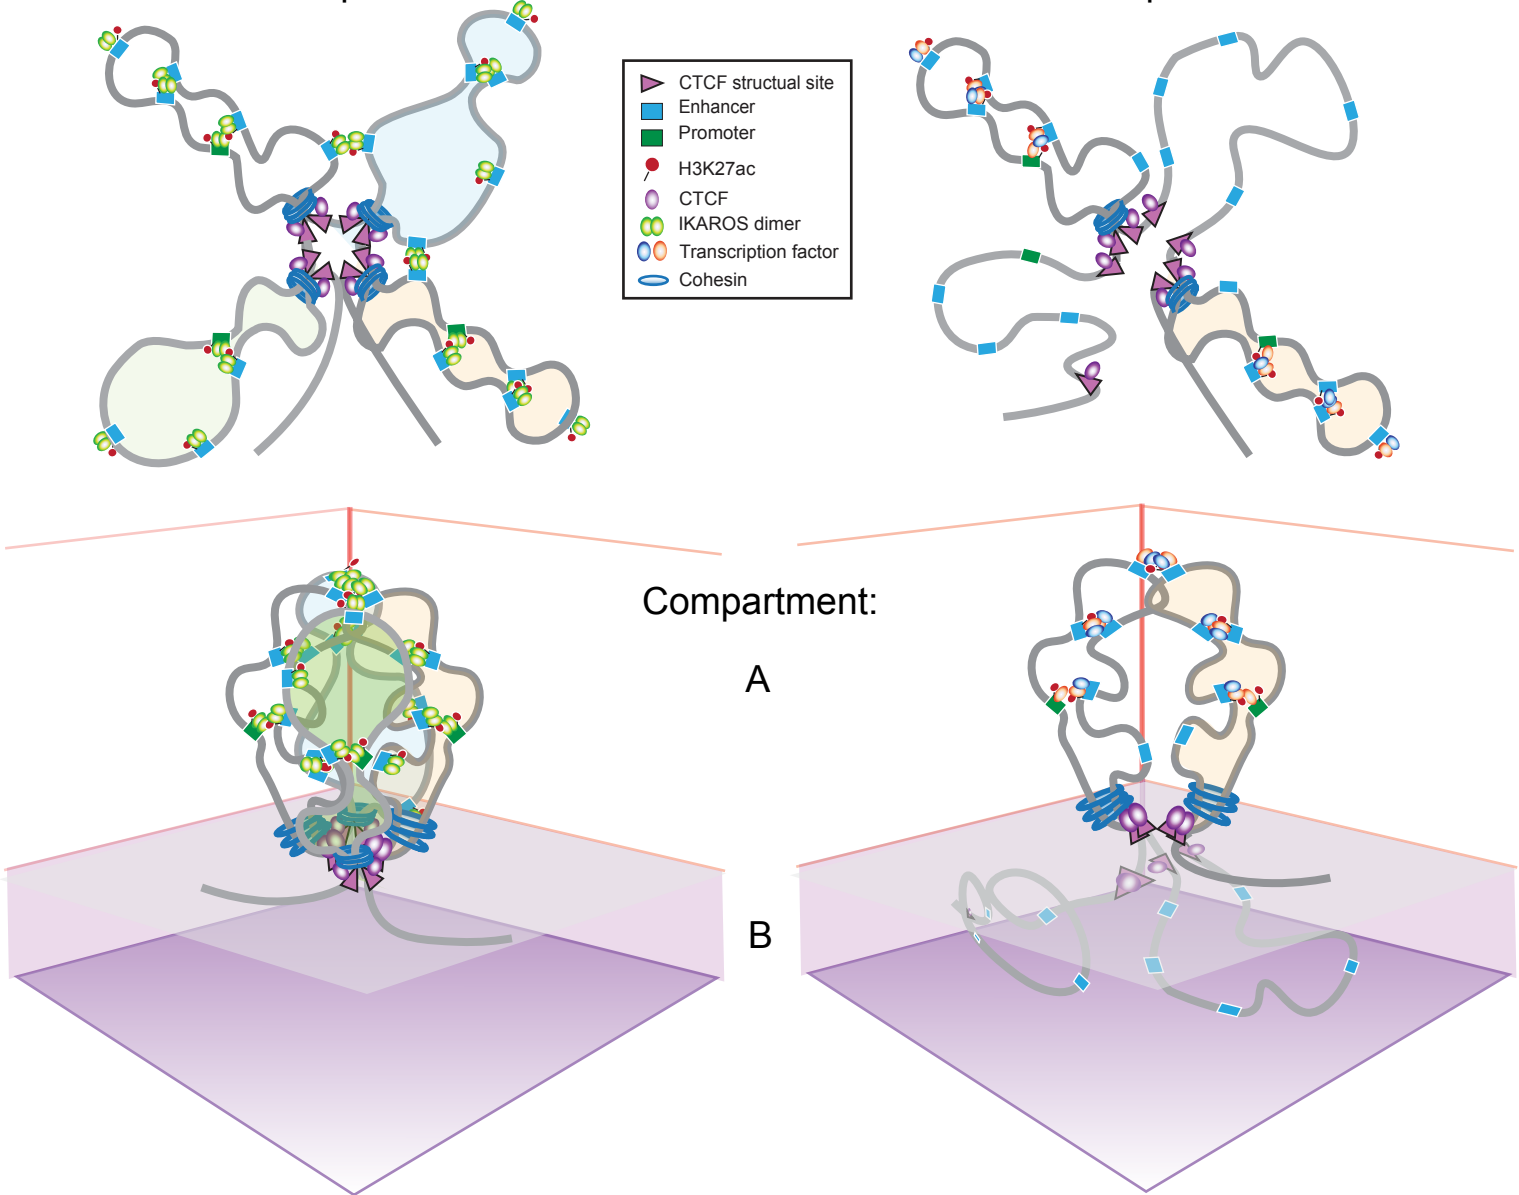

**Figure S4**
